# Supplementary figures and images for: A critical role for VEGF and VEGFR2 in NMDA receptor synaptic function and fear-related behavior
Source: PubMed Central journal article supplement — Mol Psychiatry. 2016 Jan 5;21(12):1768–80. doi: 10.1038/mp.2015.195 (PMC5116482; doi:10.1038/mp.2015.195), 2016-01-05

P15

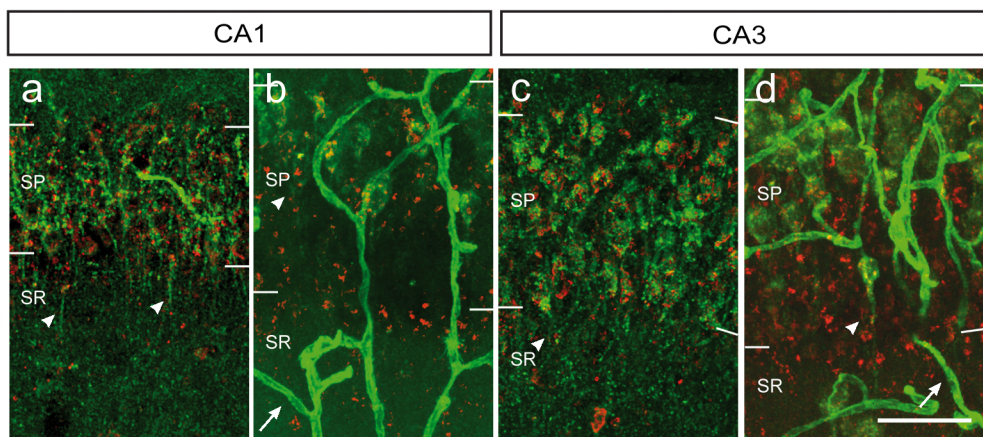

**e**

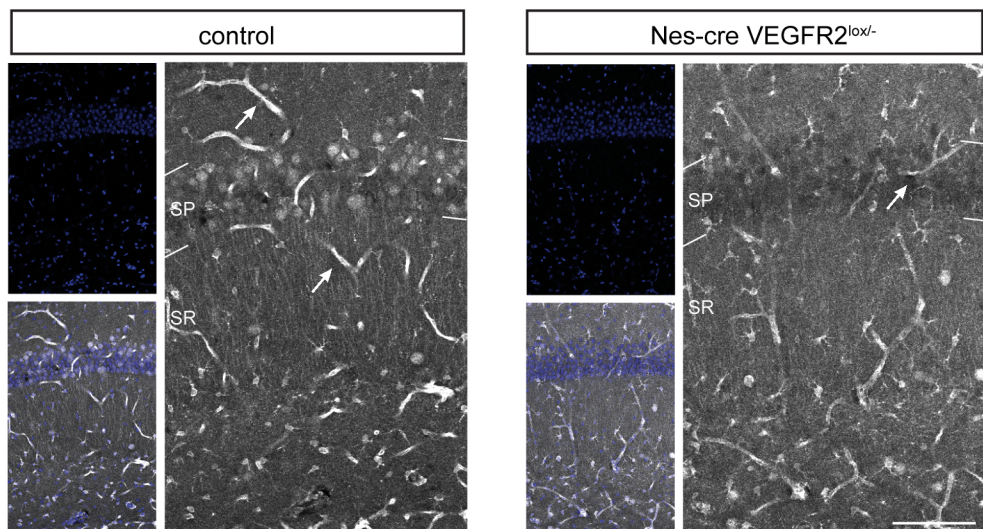

**f**

P30

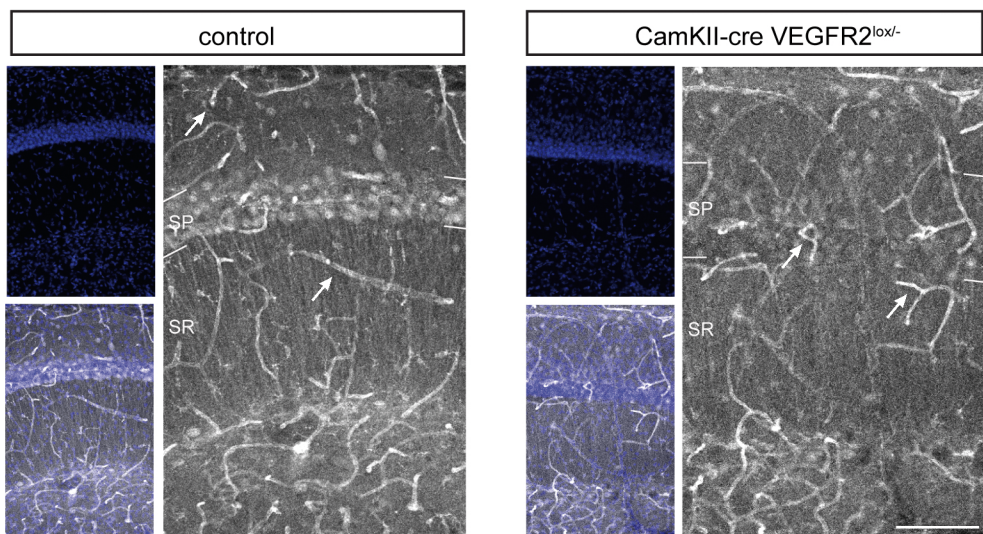

**g**

IP anti-VEGFR2: neuron culture lysate

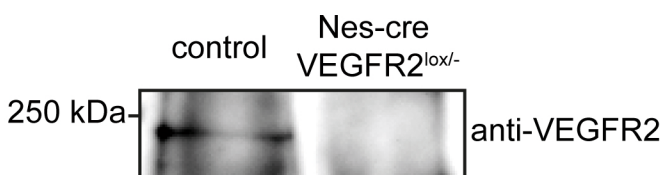

Supplement: mp2015195x2.pdf [file mp2015195x2.pdf]

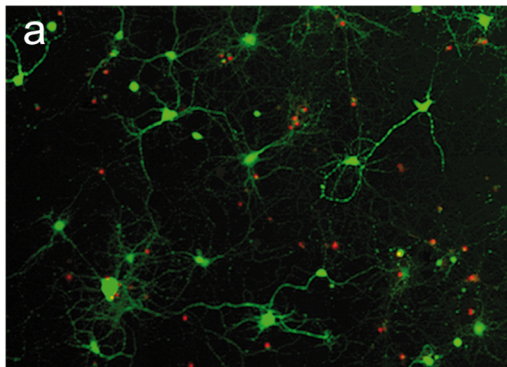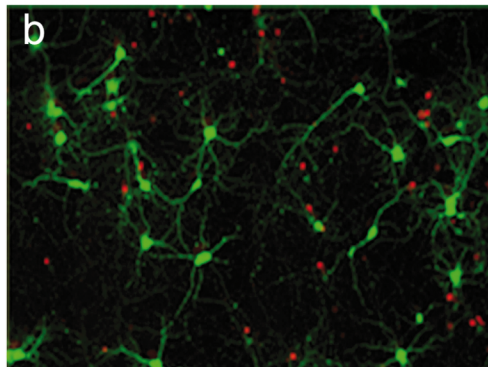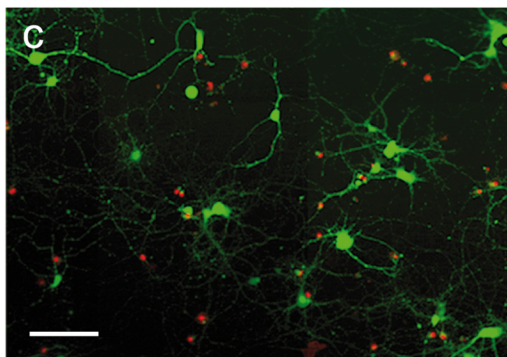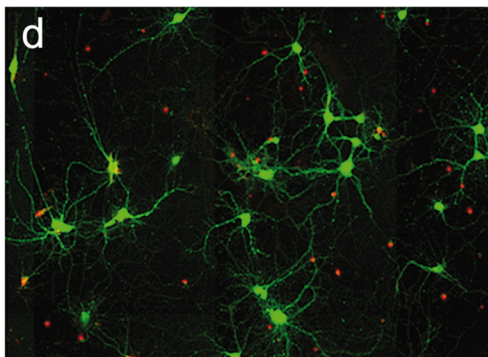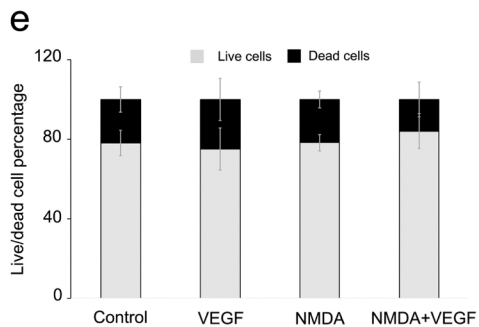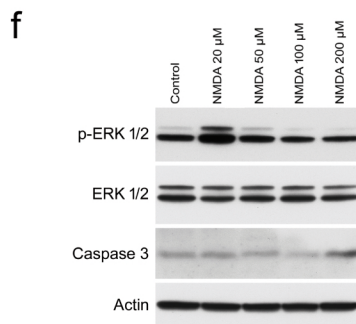

Supplement: mp2015195x3.pdf [file mp2015195x3.pdf]

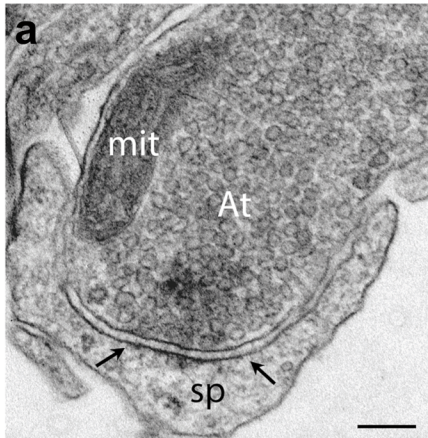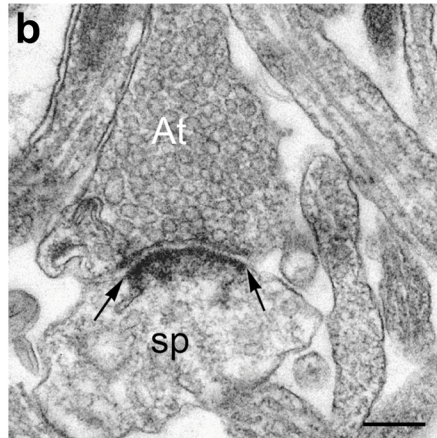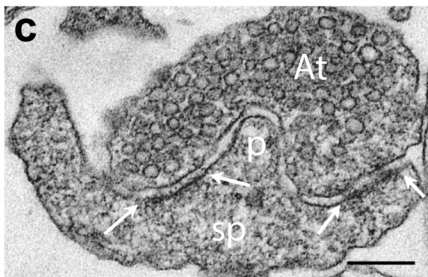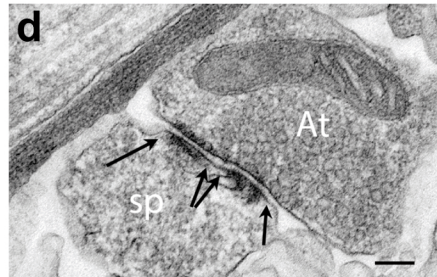

**e**

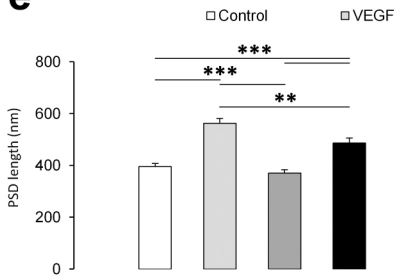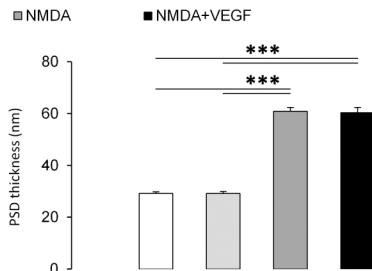

Supplement: mp2015195x5.pdf [file mp2015195x5.pdf]

DAPI

VEGFR2

a

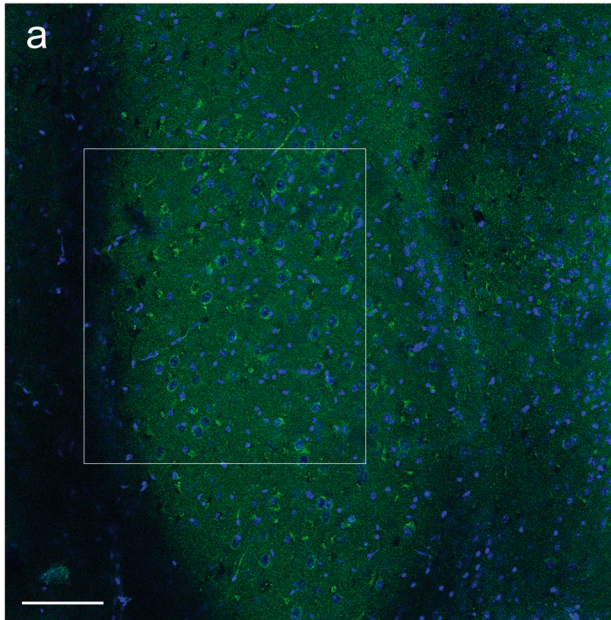

DAPI

VEGFR2

b

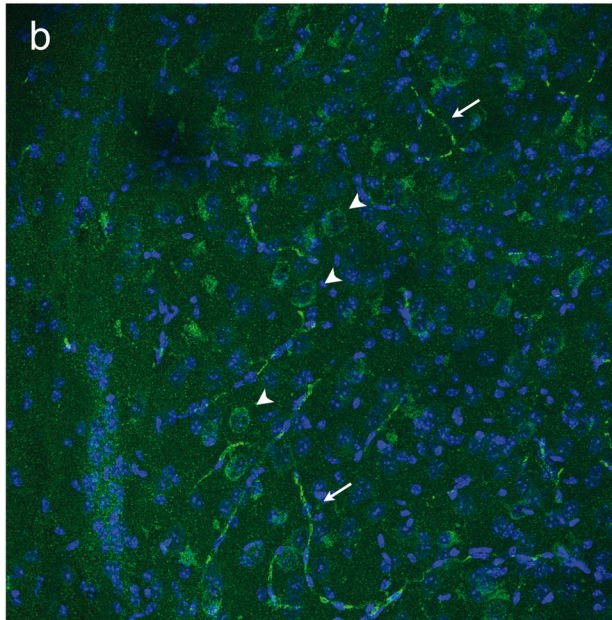

Supplement: mp2015195x8.pdf [file mp2015195x8.pdf]
